# Supplementary material for: Gene expression in bumble bee larvae differs qualitatively between high and low concentration imidacloprid exposure levels
Source: Research Square preprint supplement (doi:10.21203/rs.3.rs-1887004/v1), 2022-08-01
Supplement: Supplementary file 2 [file c31af8420691787ce142cfcc.xlsx]

## Sheet: Hoja1
Supplementary Table S6. Genes differentially expressed in other studies that are also in ours. We included the genes from studies cited in Supplemental Table S1 that were expressed in the same direction compared to our study. Because two studies used different neonicotinoid pesticide clothianidin, we opted to mark the expression as up- or down-regulated by pesticide instead. Gene identifiers belo…
Bebane et al. 2019 (P-value < 0.001)			Mobley & Gegear 2018 (P-value = 0.045)			Colgan et al. 2019 (P-value = 0.027)
Gene ID	Expression	Annotation	Gene ID	Expression	Annotation	Gene ID	Expression	Annotation
LOC100740034	Up-regulated by pesticide	sodium/calcium exchanger regulatory protein 1	LOC100740371	Up-regulated by pesticide	C-Maf-inducing protein-like	LOC100740700	Up-regulated by pesticide	tachykinin-like peptides receptor 86C
LOC100740127	Up-regulated by pesticide	cAMP-dependent protein kinase type I regulatory subunit	LOC100744622	Up-regulated by pesticide	cytochrome P450 6k1-like	LOC100741662	Up-regulated by pesticide	phosphotriesterase-related protein
LOC100740326	Up-regulated by pesticide	lipase 3	LOC100746316	Up-regulated by pesticide	fatty-acid amide hydrolase 2-like	LOC100745378	Up-regulated by pesticide	ejaculatory bulb-specific protein 3
LOC100741041	Up-regulated by pesticide	probable peroxisomal acyl-coenzyme A oxidase 1	LOC100748872	Up-regulated by pesticide	rho GTPase-activating protein 100F	LOC100745845*	Up-regulated by pesticide	cytochrome P450 6k1
LOC100741125	Up-regulated by pesticide	uncharacterized LOC100741125				LOC100746222	Up-regulated by pesticide	larval cuticle protein LCP-17-like
LOC100742045	Up-regulated by pesticide	guanine nucleotide-binding protein subunit beta-like protein				LOC100746292	Up-regulated by pesticide	ATP-binding cassette sub-family G member 1
LOC100742117	Up-regulated by pesticide	protein 5NUC				LOC105680266*	Up-regulated by pesticide	phosphoenolpyruvate carboxykinase [GTP]
LOC100742945	Up-regulated by pesticide	mucin-4				LOC100746060*	Down-regulated by pesticide	uncharacterized LOC100746060
LOC100743103	Up-regulated by pesticide	ubiquitin-protein ligase E3B
LOC100743253	Up-regulated by pesticide	putative phosphoenolpyruvate synthase
LOC100743479	Up-regulated by pesticide	sorting nexin-14
LOC100744662	Up-regulated by pesticide	methionine aminopeptidase 2
LOC100744685	Up-regulated by pesticide	phospholipid scramblase 2-like
LOC100744739	Up-regulated by pesticide	amyloid beta A4 precursor protein-binding family B member 1-interacting protein-like
LOC100745059	Up-regulated by pesticide	DNA repair protein complementing XP-G cells
LOC100745584	Up-regulated by pesticide	probable phospholipid hydroperoxide glutathione peroxidase
LOC100745615	Up-regulated by pesticide	slit homolog 3 protein
LOC100745845*	Up-regulated by pesticide	cytochrome P450 6k1
LOC100745852	Up-regulated by pesticide	probable serine/threonine-protein kinase dyrk1
LOC100745943	Up-regulated by pesticide	ATP-binding cassette sub-family A member 13
LOC100745983	Up-regulated by pesticide	prisilkin-39
LOC100746172	Up-regulated by pesticide	ATP-binding cassette sub-family G member 1
LOC100746349	Up-regulated by pesticide	lipoyltransferase 1 mitochondrial
LOC100746395	Up-regulated by pesticide	eukaryotic initiation factor 4A-I
LOC100746587	Up-regulated by pesticide	eukaryotic translation initiation factor 4E-binding protein 2
LOC100746706	Up-regulated by pesticide	mucolipin-3
LOC100747023	Up-regulated by pesticide	fructose-16-bisphosphatase 1
LOC100747388	Up-regulated by pesticide	heat shock 70 kDa protein cognate 4
LOC100747959	Up-regulated by pesticide	L-xylulose reductase
LOC100748029	Up-regulated by pesticide	battenin
LOC100748288	Up-regulated by pesticide	sialin
LOC100748399	Up-regulated by pesticide	alpha-2-macroglobulin-like protein 1
LOC100748971	Up-regulated by pesticide	leucine-rich repeat-containing protein 20
LOC100749284	Up-regulated by pesticide	antichymotrypsin-2
LOC100749497	Up-regulated by pesticide	CD63 antigen
LOC100749552	Up-regulated by pesticide	short/branched chain specific acyl-CoA dehydrogenase mitochondrial
LOC100749624	Up-regulated by pesticide	alkaline phosphatase
LOC100749754	Up-regulated by pesticide	6-phosphofructo-2-kinase/fructose-26-bisphosphatase 1
LOC100750012	Up-regulated by pesticide	pyrokinin-1 receptor
LOC100750013	Up-regulated by pesticide	translation elongation factor 2
LOC105680266*	Up-regulated by pesticide	phosphoenolpyruvate carboxykinase [GTP]
LOC105681197	Up-regulated by pesticide	venom acid phosphatase Acph-1
LOC100740166	Down-regulated by pesticide	reactive oxygen species modulator 1
LOC100740185	Down-regulated by pesticide	F-box only protein 44
LOC100740266	Down-regulated by pesticide	thioredoxin-2
LOC100740829	Down-regulated by pesticide	cytochrome c
LOC100741081	Down-regulated by pesticide	prefoldin subunit 1
LOC100741877	Down-regulated by pesticide	eukaryotic translation initiation factor 2 subunit 2
LOC100741978	Down-regulated by pesticide	complement component 1 Q subcomponent-binding protein mitochondrial
LOC100742056	Down-regulated by pesticide	cytochrome b-c1 complex subunit 7
LOC100742274	Down-regulated by pesticide	inorganic pyrophosphatase
LOC100742393	Down-regulated by pesticide	protein BUD31 homolog
LOC100742429	Down-regulated by pesticide	zinc finger matrin-type protein 2
LOC100742487	Down-regulated by pesticide	protein l(2)37Cc
LOC100742806	Down-regulated by pesticide	succinate--CoA ligase [ADP-forming] subunit beta mitochondrial
LOC100742849	Down-regulated by pesticide	grpE protein homolog mitochondrial
LOC100743026	Down-regulated by pesticide	S-phase kinase-associated protein 1
LOC100743094	Down-regulated by pesticide	dnaJ homolog subfamily C member 11
LOC100743157	Down-regulated by pesticide	activator of 90 kDa heat shock protein ATPase homolog 1
LOC100743890	Down-regulated by pesticide	mitochondrial import inner membrane translocase subunit Tim16
LOC100743944	Down-regulated by pesticide	growth hormone-inducible transmembrane protein
LOC100744569	Down-regulated by pesticide	regulator of telomere elongation helicase 1 homolog
LOC100744606	Down-regulated by pesticide	elongation factor 1-beta'
LOC100744819	Down-regulated by pesticide	histone H1A sperm-like
LOC100745189	Down-regulated by pesticide	uncharacterized LOC100745189
LOC100746060*	Down-regulated by pesticide	uncharacterized LOC100746060
LOC100746307	Down-regulated by pesticide	uncharacterized LOC100746307
LOC100747095	Down-regulated by pesticide	GTP-binding nuclear protein Ran
LOC100747348	Down-regulated by pesticide	exosome complex component CSL4
LOC100747669	Down-regulated by pesticide	serine/arginine-rich splicing factor 2
LOC100748260	Down-regulated by pesticide	mitochondrial import inner membrane translocase subunit TIM50-C
LOC100748282	Down-regulated by pesticide	copper chaperone for superoxide dismutase
LOC100748443	Down-regulated by pesticide	glycerol-3-phosphate phosphatase
LOC100748874	Down-regulated by pesticide	exosome complex component RRP45
LOC100748880	Down-regulated by pesticide	translocon-associated protein subunit alpha
LOC100749068	Down-regulated by pesticide	39S ribosomal protein L53 mitochondrial
LOC100749332	Down-regulated by pesticide	probable 28S ribosomal protein S16 mitochondrial
LOC100749945	Down-regulated by pesticide	small nuclear ribonucleoprotein-associated protein B
LOC100750104	Down-regulated by pesticide	nuclear migration protein nudC
